# Supplementary material
Source: publisher figshare collection journal article supplement (https://acs.figshare.com/ndownloader/files/9703306)
Supplement: Supplementary file 1 [file 9703306]

## Supporting materials

N-deoxycholic acid-N,O-hydroxyethyl chitosan with a sulfhydryl modification to enhance the oral absorptive efficiency of paclitaxel

Yanfang Yu,<sup>1</sup> Meirong Huo,<sup>1</sup> Ying Fu, Wei Xu, Han Cai, Lingling Yao, Qingyu Chen, Yan Mu, Jianping Zhou\*, Tingjie Yin\*

<sup>a</sup> State Key Laboratory of Natural Medicines, Department of Pharmaceutics, China Pharmaceutical University, 24 Tongjiaxiang, Nanjing 210009, China

<sup>b</sup> Department of Pharmacy, Shandong Provincial QianFoshan Hospital, Shandong University, Jinan 250014, China.

## Results

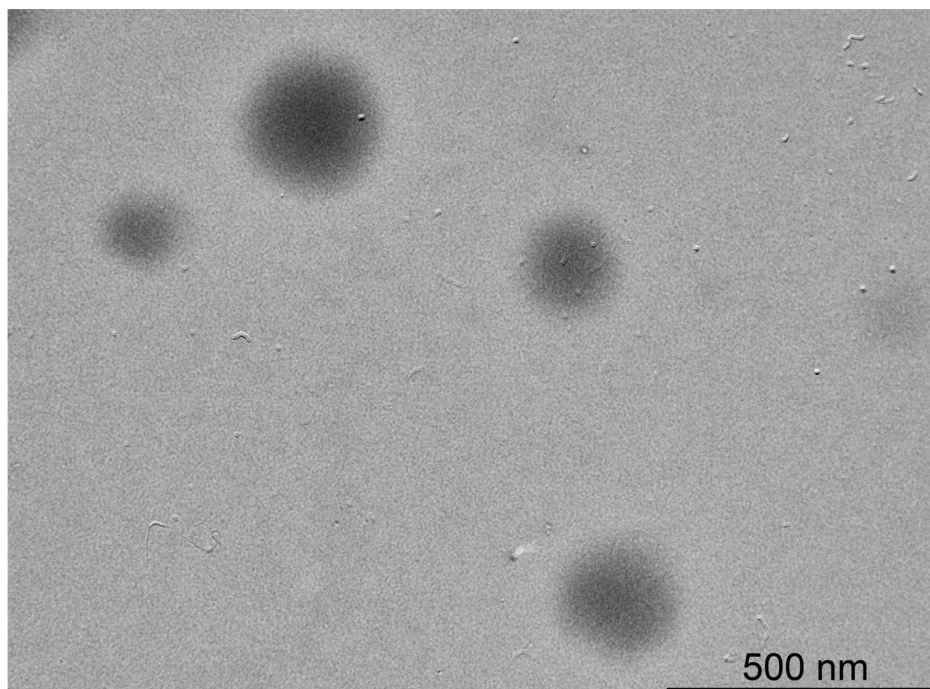

**Figure S1.** TEM images of PTX-DHC micelles.
